# Supplementary material
Source: PubMed Central journal article supplement (PMC9868031)
Supplement: 40121_2022_729_MOESM1_ESM.pdf [file 40121_2022_729_MOESM1_ESM.pdf]

# **Efficacy and safety of nirmatrelvir/ritonavir, molnupiravir and remdesivir in a real-world cohort of outpatients with COVID-19 at high risk of progression: the PISA Outpatient Clinic experience**

Giusy Tiseo<sup>1</sup>, Chiara Barbieri<sup>1</sup>, Valentina Galfo<sup>1</sup>, Sara Occhineri<sup>1</sup>, Tommaso Matucci<sup>1</sup>, Francesco Almerigogna<sup>1</sup>, Jona Kalo<sup>1</sup>, Pietro Sponga<sup>1</sup>, Mario Cesaretti<sup>1</sup>, Gabriele Marchetti<sup>1</sup>, Arianna Forniti<sup>1</sup>, Claudio Caroselli<sup>1</sup>, Simone Ferranti<sup>1</sup>, Manuela Pogliaghi<sup>1</sup>, Marina Polidori<sup>1</sup>, Silvia Fabiani<sup>1</sup>, Stefano Verdenelli<sup>1</sup>, Enrico Tagliaferri<sup>1</sup>, Niccolò Riccardi<sup>1</sup>, Lorenzo Roberto Suardi<sup>1</sup>, Claudia Carmignani<sup>2</sup>, Serena Batini<sup>3</sup>, Luca Puccetti<sup>3</sup>, Riccardo Iapoce<sup>1</sup>, Francesco Menichetti<sup>1</sup>, Marco Falcone<sup>1</sup>

<sup>1</sup> Infectious Diseases Unit, Department of Clinical and Experimental Medicine, Azienda Ospedaliera Universitaria Pisana, University of Pisa, Pisa; <sup>2</sup> Pharmaceutical Department, Azienda Ospedaliera Universitaria Pisana, Santa Chiara, Pisa; <sup>3</sup> Family Physician, Usl Nord-Ovest – Zona Pisana, Pisa, Italy

## **Corresponding author**

Prof. Marco Falcone, Department of Clinical and Experimental Medicine, University of Pisa, Italy  
Via Paradisa 2, 56124, Pisa, Italy, marco.falcone@unipi.it

## **Alternate corresponding author**

Dr Giusy Tiseo, Department of Clinical and Experimental Medicine, University of Pisa, Italy  
Via Paradisa 2, 56124, Pisa, Italy, tiseogiusy@gmail.com

**TABLE S1.** Comparison of patients who met and those who did not the composite endpoint (death or hospitalization for COVID-19).

| <b>Variable</b>                                               | <b>Death or hospitalization<br/>N=14</b> | <b>Cure<br/>N=548</b> | <b>p value</b> |
|---------------------------------------------------------------|------------------------------------------|-----------------------|----------------|
| <b>Age, ys, median (IQRs)</b>                                 | 76.5 (74.5-82)                           | 68 (54-78)            | <i>0.008</i>   |
| <b>Time from symptoms onset, days, median (IQRs)</b>          | 4.5 (3-5)                                | 3 (2-4)               | <i>0.014</i>   |
| <b>Male sex</b>                                               | 7 (50%)                                  | 295 (53.8%)           | 0.776          |
| <b>Vaccination status</b>                                     |                                          |                       |                |
| Adequate COVID-19 vaccination                                 | 10 (71.4%)                               | 445 (81.2%)           | 0.358          |
| Time from the last COVID-19 vaccine dose, days, median (IQRs) | 119 (109-124)                            | 132 (89-179)          | 0.641          |
| <b>Number of comorbidities</b>                                |                                          |                       |                |
| ≤1 comorbidity                                                | 0                                        | 129 (23.5%)           | 0.039          |
| ≥ 2 comorbidities                                             | 14 (3.2%)                                | 418 (76.3%)           | 0.038          |
| ≥ 3 comorbidities                                             | 12 (85.7%)                               | 260 (47.4%)           | <i>0.005</i>   |
| <b>Comorbidities</b>                                          |                                          |                       |                |
| Obesity, BMI ≥ 30 kg/m <sup>2</sup>                           | 3 (21.4%)                                | 139 (25.4%)           | 0.738          |
| Chronic lung disease                                          | 6 (42.9%)                                | 150 (27.4%)           | 0.201          |
| Immunosuppression (primary or acquired)                       | 6 (42.9%)                                | 123 (22.4%)           | 0.073          |
| Diabetes mellitus                                             | 5 (35.7%)                                | 100 (18.2%)           | 0.098          |
| Arterial hypertension                                         | 10 (71.4%)                               | 256 (46.7%)           | 0.067          |
| Cardiovascular disease                                        | 5 (35.7%)                                | 202 (37%)             | 0.922          |
| Cerebrovascular disease                                       | 4 (28.6%)                                | 51 (9.3%)             | <i>0.017</i>   |
| Solid cancer                                                  | 5 (35.7%)                                | 114 (20.8%)           | 0.177          |
| Hematological disease                                         | 5 (35.7%)                                | 60 (10.9%)            | <i>0.004</i>   |
| Chronic kidney disease                                        | 2 (14.3%)                                | 35 (6.4%)             | 0.239          |
| Chronic liver disease                                         | 3 (21.4%)                                | 22 (4%)               | <i>0.002</i>   |
| Autoimmune disease                                            | 5 (35.7%)                                | 79 (14.4%)            | <i>0.027</i>   |
| Solid organ transplantation                                   | 0                                        | 19 (3.5%)             | 0.478          |
| Neurological disease                                          | 0                                        | 22 (4%)               | 0.444          |
| <b>Symptoms of COVID-19</b>                                   |                                          |                       |                |
| Fever                                                         | 6 (42.9%)                                | 358 (65.3%)           | 0.082          |
| Cough                                                         | 14 (100%)                                | 418 (76.3%)           | <i>0.038</i>   |
| Dyspnea                                                       | 2 (14.3%)                                | 32 (5.8%)             | 0.191          |
| Fatigue                                                       | 6 (42.9%)                                | 240 (43.8%)           | 0.944          |
| Myalgia                                                       | 6 (42.9%)                                | 186 (33.9%)           | 0.487          |
| Gastrointestinal symptoms                                     | 5 (35.7%)                                | 62 (11.3%)            | <i>0.005</i>   |
| <b>Antiviral treatments</b>                                   |                                          |                       | <i>0.013</i>   |
| Molnupinavir                                                  | 2 (14.3%)                                | 112 (20.4%)           |                |
| Nirmaltrevir/ritonavir                                        | 2 (14.3%)                                | 250 (45.6%)           |                |
| Remdesivir                                                    | 10 (71.4%)                               | 186 (33.9%)           |                |

Italics indicates statistical significance (p<0.05)

**TABLE S2.** Comparison between patients with negative nasopharyngeal swab within 10 days versus those with negative nasopharyngeal swab > 10 days from the start of symptoms.

| Variable                                                          | Negative nasopharyngeal swab within 10 days<br>N=234 | Negative nasopharyngeal swab > 10 days<br>N=328 | p value |
|-------------------------------------------------------------------|------------------------------------------------------|-------------------------------------------------|---------|
| <b>Age, ys, median (IQRs)</b>                                     | 64 (50-76)                                           | 70.5 (57-80)                                    | <0.001  |
| <b>Time from symptoms onset to antiviral, days, median (IQRs)</b> | 3 (2-4)                                              | 3 (2-4)                                         | <0.001  |
| <b>Time from symptoms onset to antiviral, days, mean (SD)</b>     | 3 (1.2)                                              | 3.4 (1.4)                                       | <0.001  |
| <b>Male sex</b>                                                   | 126 (53.8%)                                          | 176 (53.7%)                                     | 0.965   |
| <b>Vaccination status</b>                                         |                                                      |                                                 |         |
| Adequate COVID-19 vaccination                                     | 202 (86.3%)                                          | 253 (77.1%)                                     | 0.006   |
| Time from the last COVID-19 vaccine dose, days, median (IQRs)     | 136 (91-172)                                         | 129 (86-181)                                    | 0.973   |
| <b>Number of comorbidities</b>                                    |                                                      |                                                 |         |
| ≤1 comorbidity                                                    | 66 (28.2%)                                           | 63 (19.2%)                                      | 0.012   |
| ≥ 2 comorbidities                                                 | 167 (71.4%)                                          | 265 (80.8%)                                     | 0.009   |
| ≥ 3 comorbidities                                                 | 103 (44%)                                            | 169 (51.5%)                                     | 0.079   |
| <b>Comorbidities</b>                                              |                                                      |                                                 |         |
| Obesity, BMI ≥ 30 kg/m <sup>2</sup>                               | 69 (29.5%)                                           | 73 (22.3%)                                      | 0.052   |
| Chronic lung disease                                              | 60 (25.6%)                                           | 96 (29.3%)                                      | 0.344   |
| Immunosuppression (primary or acquired)                           | 50 (21.4%)                                           | 79 (24.1%)                                      | 0.450   |
| Diabetes mellitus                                                 | 46 (19.7%)                                           | 59 (18%)                                        | 0.617   |
| Arterial hypertension                                             | 99 (42.3%)                                           | 167 (50.9%)                                     | 0.044   |
| Cardiovascular disease                                            | 76 (32.5%)                                           | 131 (40.2%)                                     | 0.062   |
| Cerebrovascular disease                                           | 18 (7.7%)                                            | 37 (11.3%)                                      | 0.158   |
| Solid cancer                                                      | 47 (20.1%)                                           | 72 (22%)                                        | 0.594   |
| Hematological disease                                             | 23 (9.8%)                                            | 42 (12.8%)                                      | 0.277   |
| Chronic kidney disease                                            | 11 (4.7%)                                            | 26 (7.9%)                                       | 0.128   |
| Chronic liver disease                                             | 8 (3.4%)                                             | 17 (5.2%)                                       | 0.317   |
| Autoimmune disease                                                | 37 (15.8%)                                           | 47 (14.3%)                                      | 0.627   |
| Solid organ transplantation                                       | 5 (2.1%)                                             | 14 (4.3%)                                       | 0.168   |
| Neurological disease                                              | 12 (5.2%)                                            | 10 (3.1%)                                       | 0.209   |
| <b>Symptoms of COVID-19</b>                                       |                                                      |                                                 |         |
| Fever                                                             | 153 (65.4%)                                          | 211 (64.3%)                                     | 0.796   |
| Cough                                                             | 171 (73.1%)                                          | 261 (79.6%)                                     | 0.072   |
| Dyspnea                                                           | 12 (5.1%)                                            | 22 (6.7%)                                       | 0.439   |
| Fatigue                                                           | 111 (47.4%)                                          | 135 (41.2%)                                     | 0.139   |
| Myalgia                                                           | 84 (35.9%)                                           | 108 (32.9%)                                     | 0.464   |
| Gastrointestinal symptoms                                         | 21 (9%)                                              | 46 (14%)                                        | 0.069   |
| <b>Antiviral discontinuation for adverse event</b>                | 6 (2.6%)                                             | 3 (0.9%)                                        | 0.174   |
| <b>Antivirals</b>                                                 |                                                      |                                                 | <0.001  |
| Molnupinavir                                                      | 43 (18.4%)                                           | 71 (21.6%)                                      |         |
| Nirmaltrevir/ritonavir                                            | 133 (56.8%)                                          | 119 (36.3%)                                     |         |
| Remdesivir                                                        | 58 (24.8%)                                           | 138 (42.1%)                                     |         |

Italics indicates statistical significance (p<0.05)

**FIGURE S1.** Multivariable hazard ratios for factors associated with increased probability to have a negative nasopharyngeal swab within 10 days from the first positive one in patients treated with nirmatrelvir/ritonavir vs those treated with molnupinavir.

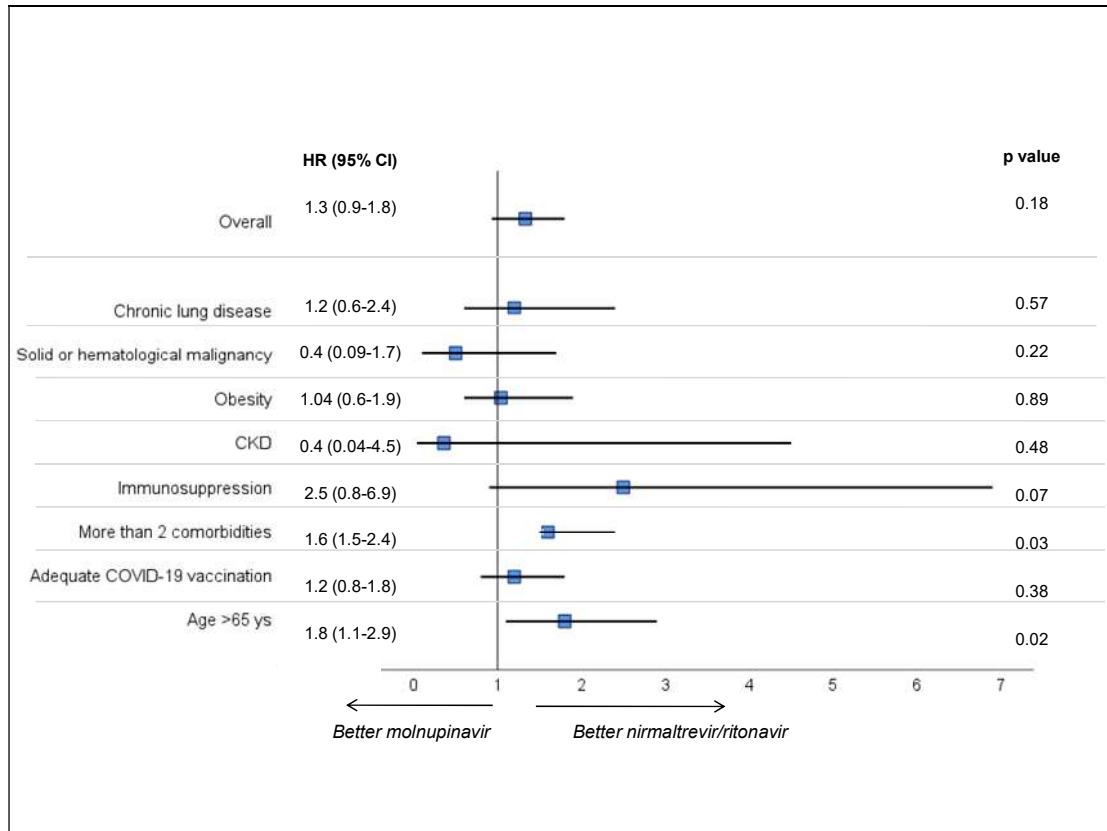

The multivariable model was adjusted for: age <80 ys, adequate COVID-19 vaccination,  $\geq 2$  comorbidities, hypertension, time from symptoms onset, hematological malignancy, immunosuppression, chronic lung disease. Antiviral treatments were modeled as time-dependent variable

**FIGURE S2.** Multivariable hazard ratios for factors associated with increased probability to have a negative nasopharyngeal swab within 10 days from the first positive one in patients treated with molnupinavir vs those treated with remdesivir.

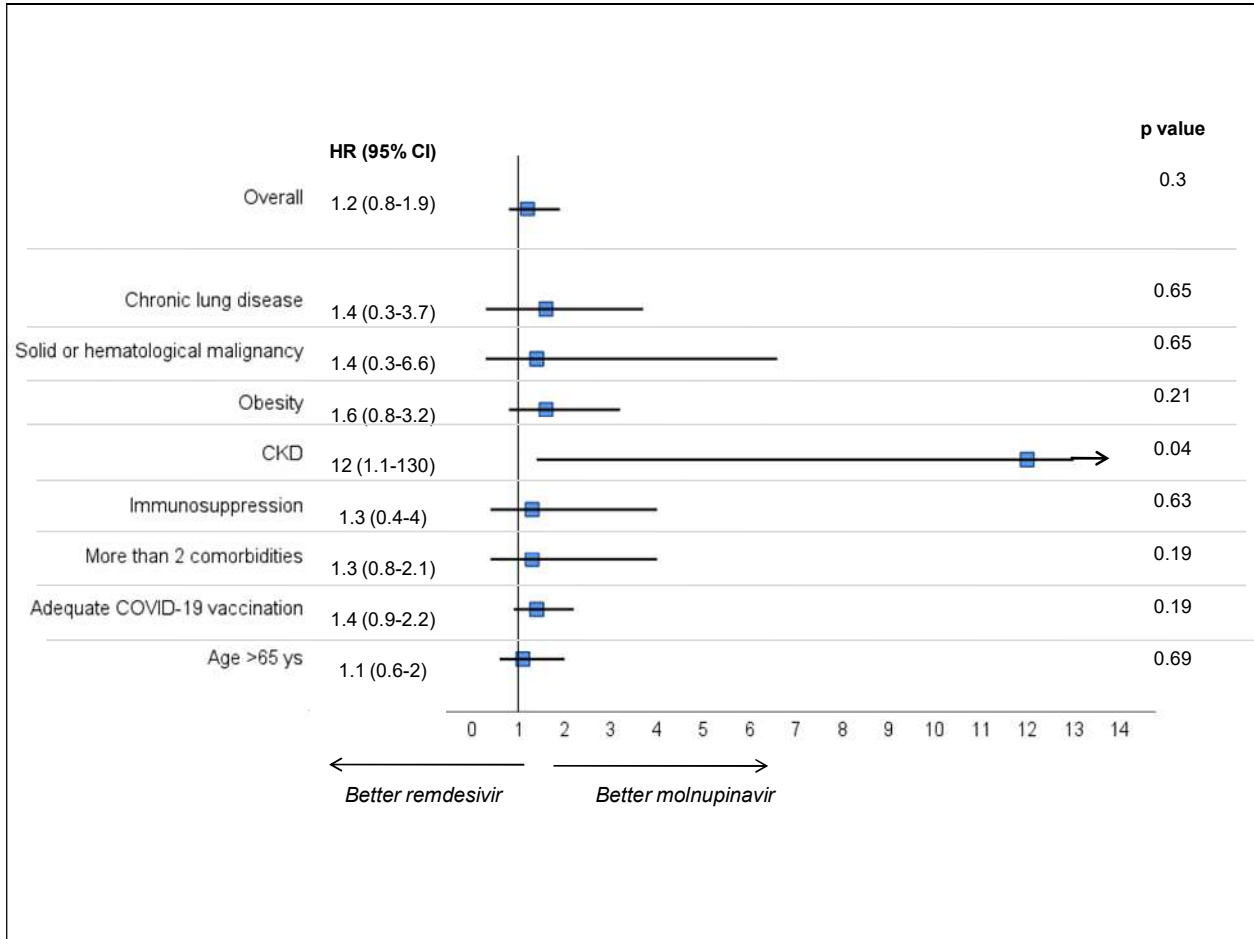

The multivariable model was adjusted for: age <80 ys, adequate COVID-19 vaccination,  $\geq 2$  comorbidities, hypertension, time from symptoms onset, hematological malignancy, immunosuppression, chronic lung disease. Antiviral treatments were modeled as time-dependent variable
